# Supplementary material
Source: Springer Nature journal article supplement (https://www.springermedizin.de/resource/supplementary/12943_2008_364_MOESM7_ESM.pdf/9554022)

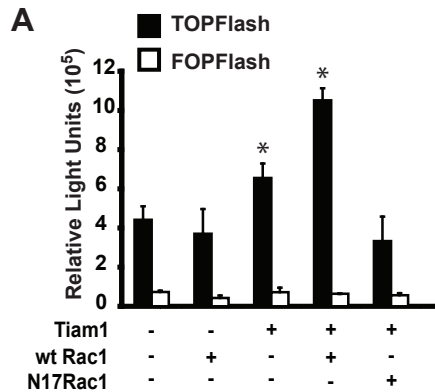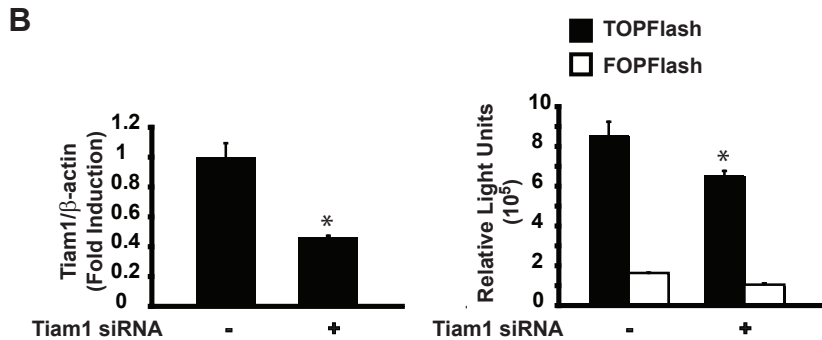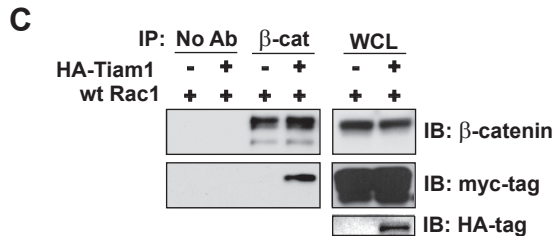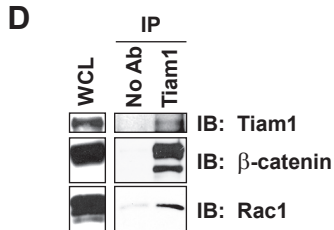

Supplement: MOESM7 [file 9554022]
